# Supplementary material
Source: PubMed Central journal article supplement (PMC8352496)
Supplement: mmc1.pdf [file mmc1.pdf]

# THE LANCET

## Rheumatology

### Supplementary appendix

This appendix formed part of the original submission and has been peer reviewed.  
We post it as supplied by the authors.

Supplement to: Kyriazopoulou E, Huet T, Cavalli G, et al. Effect of anakinra on mortality in patients with COVID-19: a systematic review and patient-level meta-analysis. *Lancet Rheumatol* 2021; published online Aug 9. [https://doi.org/10.1016/S2665-9913\(21\)00216-2](https://doi.org/10.1016/S2665-9913(21)00216-2).

**Search Strategy.**

| <b>PubMed (Date Run: 22/01/2021)</b> |                                                                                                                                                                                                                                                                                                                                                                                                             |              |
|--------------------------------------|-------------------------------------------------------------------------------------------------------------------------------------------------------------------------------------------------------------------------------------------------------------------------------------------------------------------------------------------------------------------------------------------------------------|--------------|
| <b>Step</b>                          | <b>Search strategy</b>                                                                                                                                                                                                                                                                                                                                                                                      | <b>Found</b> |
| #1                                   | ((((COVID-19[MeSH Terms]) AND (anakinra[MeSH Terms])) OR ((COVID-19[MeSH Terms]) AND (interleukin blockade[MeSH Terms])) OR ((COVID-19[MeSH Terms]) AND (interleukin-1[MeSH Terms])) OR ((SARS-CoV-2[MeSH Terms]) AND (anakinra[MeSH Terms])) OR ((SARS-CoV-2[MeSH Terms]) AND (interleukin blockade[MeSH Terms])) OR ((SARS-CoV-2[MeSH Terms]) AND (interleukin-1[MeSH Terms]))))                          | 95           |
| #2                                   | ((((COVID-19[MeSH Terms]) AND (anakinra[MeSH Terms])) OR ((COVID-19[MeSH Terms]) AND (interleukin blockade[MeSH Terms])) OR ((COVID-19[MeSH Terms]) AND (interleukin-1[MeSH Terms])) OR ((SARS-CoV-2[MeSH Terms]) AND (anakinra[MeSH Terms])) OR ((SARS-CoV-2[MeSH Terms]) AND (interleukin blockade[MeSH Terms])) OR ((SARS-CoV-2[MeSH Terms]) AND (interleukin-1[MeSH Terms])))) Filters: Humans, English | 92           |

| <b>Cochrane Central Register of Clinical Trials (Date Run: 22/01/2021)</b> |                                                              |              |
|----------------------------------------------------------------------------|--------------------------------------------------------------|--------------|
| <b>ID</b>                                                                  | <b>Search strategy</b>                                       | <b>Found</b> |
| #1                                                                         | (COVID-19):ti,ab,kw OR ("SARS Co-V"):ti,ab,kw                | 3728         |
| #2                                                                         | ("anakinra"):ti,ab,kw OR ("interleukin-1 blockade"):ti,ab,kw | 412          |
| #3                                                                         | #1 AND #2                                                    | 30           |
| #4                                                                         | Removal of duplicates                                        | 1            |

| <b>Medrxiv.org (Date Run: 22/01/2021)</b> |                                                                  |              |
|-------------------------------------------|------------------------------------------------------------------|--------------|
| <b>ID</b>                                 | <b>Search strategy</b>                                           | <b>Found</b> |
| #1                                        | Anakinra AND COVID-19                                            | 10           |
| #2                                        | Interleukin blockade AND COVID-19                                | 6            |
| #3                                        | Interleukin-1 AND COVID-19                                       | 7            |
| #4                                        | (Anakinra OR interleukin blockade OR interleukin-1) AND COVID-19 | 23           |

| <b>Biorxiv.org (Date Run: 22/01/2021)</b> |                                                                  |              |
|-------------------------------------------|------------------------------------------------------------------|--------------|
| <b>ID</b>                                 | <b>Search strategy</b>                                           | <b>Found</b> |
| #1                                        | anakinra AND COVID-19                                            | 4            |
| #2                                        | Interleukin blockade AND COVID-19                                | 0            |
| #3                                        | Interleukin-1 AND COVID-19                                       | 22           |
| #4                                        | (Anakinra OR interleukin blockade OR interleukin-1) AND COVID-19 | 26           |

| <b>Clinicaltrials.gov (Date Run: 22/01/2021)</b> |                        |              |
|--------------------------------------------------|------------------------|--------------|
| <b>ID</b>                                        | <b>Search strategy</b> | <b>Found</b> |
| #1                                               | anakinra AND COVID-19  | 34           |
| #2                                               | Removal of duplicates  | 32           |

**eTable 1.** Ongoing trials of anakinra administration in patients with pneumonia due to COVID-19.

| Study                                                                                                                                                           | Country      | Inclusion criteria of thrombo-inflammation                                                                                                                                 | Arms of treatment                                                                                                                                                                               | Number of patients | Primary Endpoint                                                                              |
|-----------------------------------------------------------------------------------------------------------------------------------------------------------------|--------------|----------------------------------------------------------------------------------------------------------------------------------------------------------------------------|-------------------------------------------------------------------------------------------------------------------------------------------------------------------------------------------------|--------------------|-----------------------------------------------------------------------------------------------|
| Anakinra in the Management of COVID-19 Infection (NCT04643678)                                                                                                  | Qatar        | Signs of cytokine release syndrome                                                                                                                                         | <ul style="list-style-type: none"> <li>Anakinra</li> <li>SOC</li> </ul>                                                                                                                         | 80                 | WHO Clinical Progression score at day 14                                                      |
| Early Treatment of Cytokine Storm Syndrome in Covid-19 (NCT04362111)                                                                                            | Alabama, US  | Ferritin >700 ng/ml and fever >38°C and any 3 of: d-dimer>500 ng/ml; plt <130,000/mm <sup>3</sup> ; WBC<3500/mm <sup>3</sup> ; AST or ALT>2x ULN; LDH>2x ULN; CRP>100 mg/L | <ul style="list-style-type: none"> <li>Anakinra</li> <li>Placebo</li> </ul>                                                                                                                     | 30                 | Percentage of patients discharged alive and without need for mechanical ventilation at day 28 |
| suPAR-Guided Anakinra Treatment for Management of Severe Respiratory Failure by COVID-19 (SAVE-MORE) (NCT04680949)                                              | Greece       | Plasma suPAR ≥6ng/ml                                                                                                                                                       | <ul style="list-style-type: none"> <li>Anakinra</li> <li>Placebo</li> </ul>                                                                                                                     | 600                | WHO Clinical Progression ordinal Scale at day 28                                              |
| Anakinra, COVID-19, Cytokine Storm (Sobi) (NCT04603742)                                                                                                         | New York, US | Cytokine release syndrome                                                                                                                                                  | <ul style="list-style-type: none"> <li>Anakinra</li> <li>Placebo</li> </ul>                                                                                                                     | 100                | Number of subjects alive without having required mechanical ventilation at day 28             |
| A Trial Using anakinra, tocilizumab Alone or in Association With ruxolitinib in Severe Stage 2b and 3 of COVID19-associated Disease (INFLAMMACOV) (NCT04424056) | France       | Early stage: CRP>150mg/l<br>Advanced stage: ferritin>5000ng/ml                                                                                                             | <ul style="list-style-type: none"> <li>Anakinra +/- Ruxolitinib</li> <li>Anakinra + ruxolitinib</li> <li>Tocilizumab +/- ruxolitinib</li> <li>Tocilizumab + ruxolitinib</li> <li>SOC</li> </ul> | 216                | Ventilation free days at day 28                                                               |
| The Immunomodulation-CoV Assessment (ImmCoVA) Study (NCT04412291)                                                                                               | Sweden       | CRP >70mg/L and ferritin >500µg/L and at least 2 of: lymphocytes <1x 10 <sup>9</sup> /L; D-dimer ≥0.5mg/L; LDH ≥8microkatal/L.                                             | <ul style="list-style-type: none"> <li>Anakinra</li> <li>Tocilizumab</li> <li>SOC</li> </ul>                                                                                                    | 120                | Time to recovery at day 29                                                                    |
| Clinical Trial of the Use of Anakinra in Cytokine Storm Syndrome Secondary to Covid-19 (ANA-COVID-GEAS) (NCT04443881)                                           | Spain        | Suspicion of cytokine release syndrome                                                                                                                                     | <ul style="list-style-type: none"> <li>Anakinra</li> <li>SOC</li> </ul>                                                                                                                         | 180                | Number of patients not requiring mechanical ventilation at day 15                             |

|                                                                                                                                       |         |                                                                                                                                                    |                                                                                                                                                                      |     |                                        |
|---------------------------------------------------------------------------------------------------------------------------------------|---------|----------------------------------------------------------------------------------------------------------------------------------------------------|----------------------------------------------------------------------------------------------------------------------------------------------------------------------|-----|----------------------------------------|
| Treatment of COVID-19 Patients With Anti-interleukin Drugs (COV-AID) (NCT04330638)                                                    | Belgium | Ferritin >1000 µg/L; or lymphopenia <800 µl and 2 of the following extra: ferritin > 700µg/L or LDH>300 IU/L or D-Dimers >1000 ng/mL or CRP>70mg/L | <ul style="list-style-type: none"> <li>• Anakinra</li> <li>• Siltuximab</li> <li>• Anakinra + siltuximab</li> <li>• Anakinra + tocilizumab</li> <li>• SOC</li> </ul> | 342 | Time to clinical improvement at day 15 |
| Trial Evaluating Efficacy Of Anakinra In Patients With Covid-19 Infection (CORIMUNO-ANA-2) (NCT04341584)                              | France  | CRP>25mg/L                                                                                                                                         | <ul style="list-style-type: none"> <li>• Anakinra</li> <li>• SOC</li> </ul>                                                                                          | 161 | WHO Clinical Progression ordinal Scale |
| Evaluation of Safety and efficacy of anakinra utilization in COVID-19, a randomized controlled clinical trial (IRCT20120703010178N20) | Iran    | –                                                                                                                                                  | <ul style="list-style-type: none"> <li>• Anakinra</li> <li>• SOC</li> </ul>                                                                                          | 30  | WHO Clinical Progression ordinal Scale |

**eTable 2.** Risk assessment of included studies according to Newcastle-Ottawa Quality Assessment Scale.

| Ref. | Selection                                |                                     |                           | Comparability                                                         |                                                                 | Outcome               |                                                 |                                  | Total |
|------|------------------------------------------|-------------------------------------|---------------------------|-----------------------------------------------------------------------|-----------------------------------------------------------------|-----------------------|-------------------------------------------------|----------------------------------|-------|
|      | Representativeness of the exposed cohort | Selection of the non-exposed cohort | Ascertainment of exposure | Demonstration that outcome of interest was not present at study start | Comparability of cohorts on the basis of the design or analysis | Assessment of outcome | Was follow-up long enough for outcomes to occur | Adequacy of follow up of cohorts |       |
| 29   | *                                        | *                                   | *                         | *                                                                     | **                                                              | *                     | *                                               | *                                | 9     |
| 24   |                                          | *                                   | *                         | *                                                                     | **                                                              | *                     | *                                               | *                                | 8     |
| 21   |                                          | *                                   | *                         | *                                                                     | **                                                              | *                     | *                                               | *                                | 8     |
| 25   |                                          | *                                   | *                         | *                                                                     | **                                                              | *                     | *                                               | *                                | 8     |
| 22   | *                                        | *                                   | *                         | *                                                                     | **                                                              | *                     | *                                               | *                                | 9     |
| 27   |                                          | *                                   | *                         | *                                                                     | **                                                              | *                     | *                                               | *                                | 8     |
| 28   |                                          | *                                   | *                         | *                                                                     | **                                                              | *                     | *                                               | *                                | 8     |
| 23   | *                                        | *                                   | *                         | *                                                                     | **                                                              | *                     | *                                               | *                                | 9     |
| 26   | *                                        | *                                   | *                         | *                                                                     | **                                                              | *                     | *                                               | *                                | 9     |

### Selection

Representativeness of the exposed cohort (\* for a and b) a) truly representative of the average in the community; b) somewhat representative of the average in the community; c) selected group of users eg nurses, volunteers; d) no description of the derivation of the cohort

Selection of the non-exposed cohort (\* for a) a) drawn from the same community as the exposed cohort; b) drawn from a different source; c) no description of the derivation of the non-exposed cohort

Ascertainment of exposure (\* for a and b) a) secure record (eg surgical records); b) structured interview; c) written self report; d) no description

Demonstration that outcome of interest was not present at start of study (\* for a) a) yes; b) no

### Comparability

Comparability of cohorts on the basis of the design or analysis a) study controls for the most important factor \*\*; b) study controls for any additional factor\*

### Outcome

Assessment of outcome (\* for a and b) a) independent blind assessment; b) record linkage; c) self report; d) no description

Was follow-up long enough for outcomes to occur (\* for a) a) yes; b) no

Adequacy of follow up of cohorts (\* for a and b) a) complete follow up - all subjects accounted for; b) subjects lost to follow up unlikely to introduce bias - small number lost; c) follow up rate large and no description of those lost; d) no statement

**Figure 1.** Funnel plot of publication bias for trials included in the analysis of the primary endpoint. Test for funnel plot asymmetry:  $t = -0.9137$ ,  $df = 7$ ,  $p = 0.391$

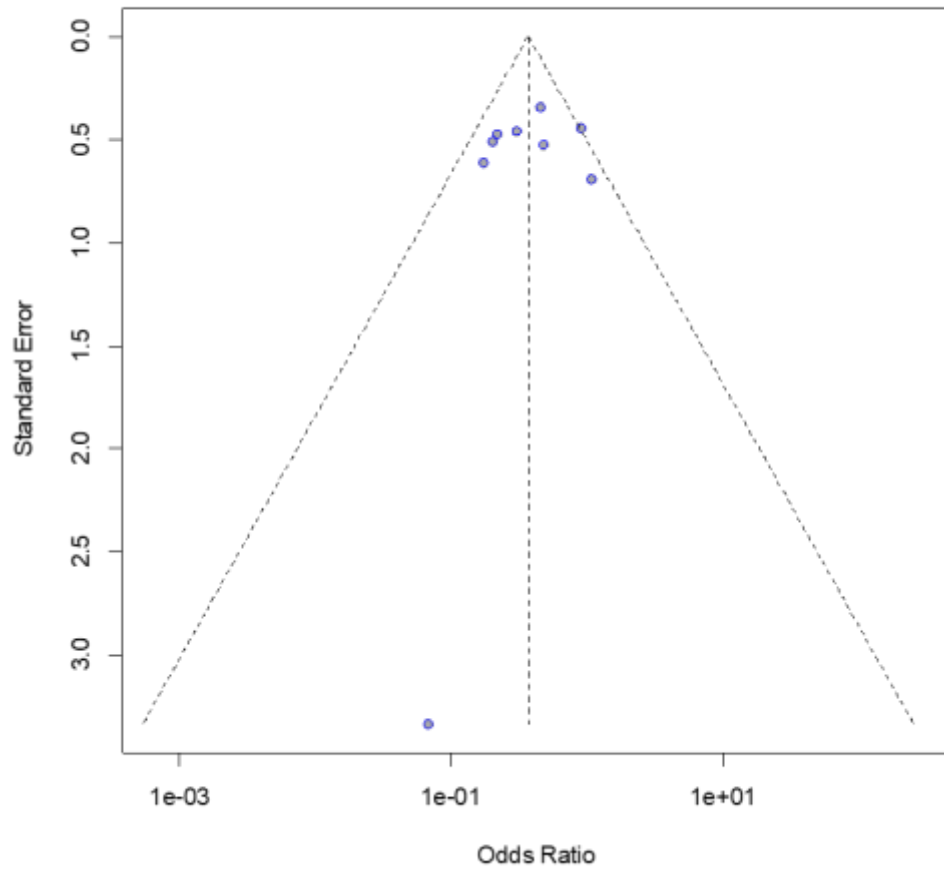

**eFigure 2.** Forest plot of pooled odds ratio and respective confidence interval (CI) of onset of adverse events with anakinra treatment versus comparators. A) Elevated liver function tests; B) Leukopenia; and C) Onset of breakthrough infection.

A

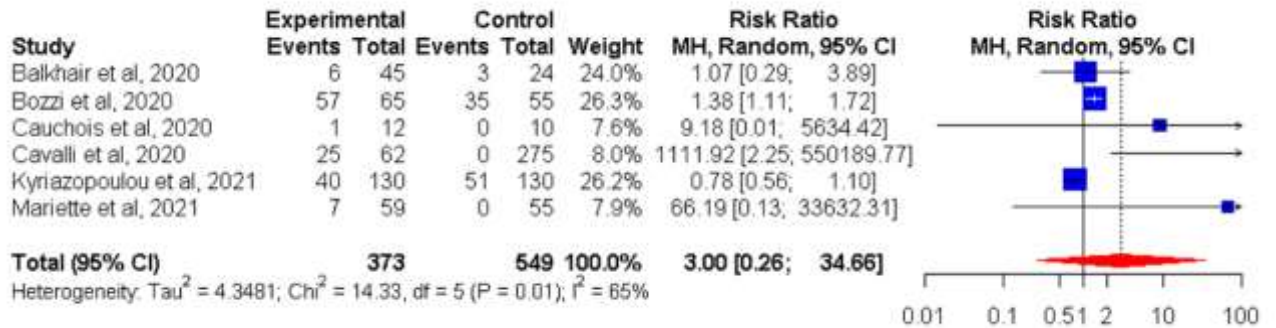

B

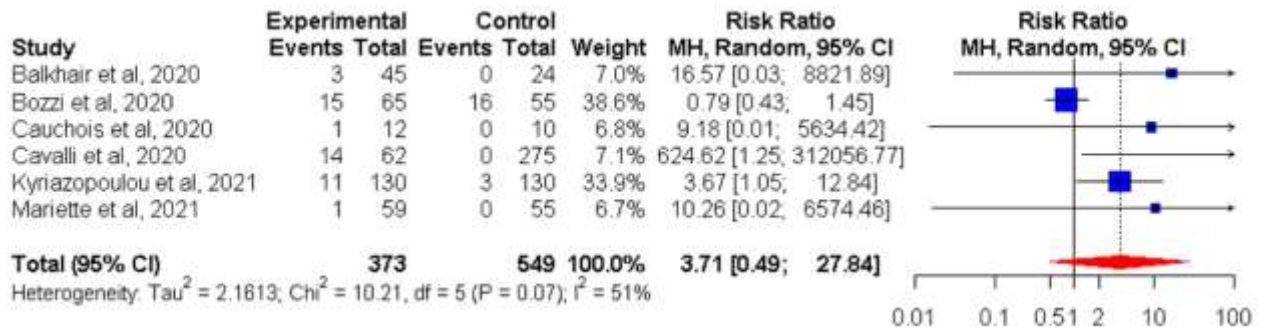

C

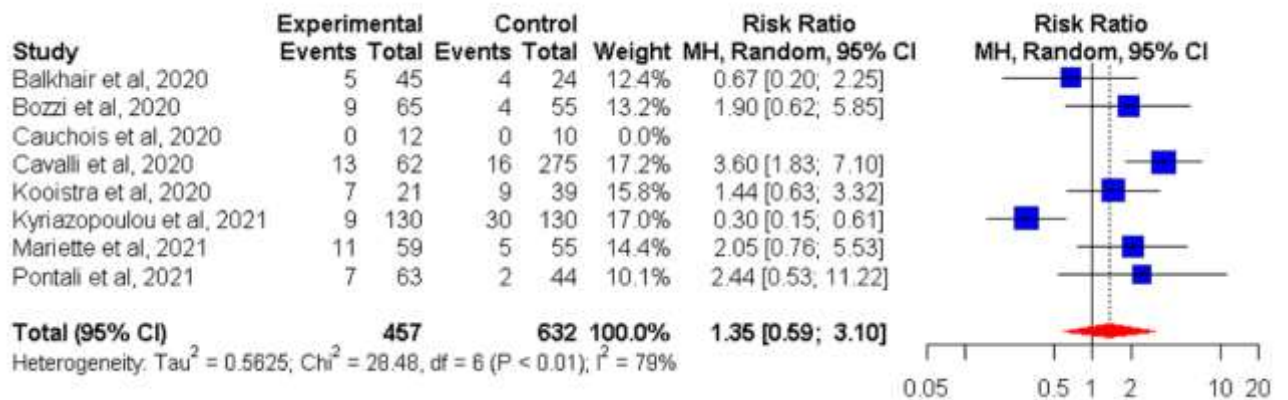



## **International Collaborative Group for anakinra in COVID-19**

### Main collaborators

Stefano Volpi<sup>1</sup>, Maria Pia Sormani<sup>2</sup>, Alessio Signori<sup>2</sup>, Giorgio Bozzi<sup>3</sup>, Francesca Minoia<sup>3</sup>, Stefano Aliberti<sup>3</sup>, Giacomo Grasselli<sup>3</sup>, Laura Alagna<sup>3</sup>, Andrea Lombardi<sup>3</sup>, Riccardo Ungaro<sup>3</sup>, Carlo Agostoni<sup>3</sup>, Francesco Blasi<sup>3</sup>, Giorgio Costantino<sup>3</sup>, Anna Ludovica Fracanzani<sup>3</sup>, Nicola Montano<sup>3</sup>, Flora Peyvandi<sup>3</sup>, Marcello Sottocorno<sup>3</sup>, Antonio Muscatello<sup>3</sup>, Giovanni Filocamo<sup>3</sup>, Antonios Papadopoulos<sup>4</sup>, Maria Mouktaroudi<sup>4</sup>, Eleni Karakike<sup>4</sup>, Maria Saridaki<sup>4</sup>, Theologia Gkavogianni<sup>4</sup>, Konstantina Katrini<sup>4</sup>, Nikolaos Vechlidis<sup>4</sup>, Christina Avgoustou<sup>4</sup>, Stamatios Chalvatzis<sup>4</sup>, Theodoros Marantos<sup>4</sup>, Christina Damoulari<sup>4</sup>, Georgia Damoraki<sup>4</sup>, Sofia Ktena<sup>4</sup>, Maria Tsilika<sup>4</sup>, Panagiotis Koufargyris<sup>4</sup>, Athanasios Karageorgos<sup>4</sup>, Dionysia-Irene Droggiti<sup>4</sup>, Aikaterini Koliakou<sup>4</sup>, Garyfallia Poulakou<sup>5</sup>, Konstantinos Tsiakos<sup>5</sup>, Dimitra-Melia Myrodia<sup>5</sup>, Areti Gravvani<sup>5</sup>, Ioannis P. Trontzas<sup>5</sup>, Konstantinos Syrigos<sup>5</sup>, Ioannis Kalomenidis<sup>6</sup>, Eleftheria Kranidioti<sup>6</sup>, Periklis Panagopoulos<sup>7</sup>, Vasileios Petrakis<sup>7</sup>, Simeon Metallidis<sup>8</sup>, Georgia Loli<sup>8</sup>, Olga Tsachouridou<sup>8</sup>, George N. Dalekos<sup>9</sup>, Nikolaos Gatselis<sup>9</sup>, Aggelos Stefanos<sup>9</sup>, Sarah Georgiadou<sup>9</sup>, Vassiliki Lygoura<sup>9</sup>, Haralampos Milionis<sup>10</sup>, Maria Kosmidou<sup>10</sup>, Ilias C. Papanikolaou<sup>11</sup>, Karolina Akinosoglou<sup>12</sup>, Efthymia Giannitsioti<sup>13</sup>, Georgios Chrysos<sup>13</sup>, Panagiotis Mavroudis<sup>13</sup>, Chrysanthi Sidiropoulou<sup>13</sup>, Georgios Adamis<sup>14</sup>, Archontoula Fragkou<sup>15</sup>, Aggeliki Rapti<sup>16</sup>, Zoi Alexiou<sup>17</sup>, Styliani Symbardi<sup>18</sup>, Aikaterini Masgala<sup>19</sup>, Konstantina Kostaki<sup>19</sup>, Evangelos Kostis<sup>20</sup>, Michael Samarkos<sup>21</sup>, Petros Bakakos<sup>22</sup>, Vassiliki Tzavara<sup>23</sup>, Katerina Dimakou<sup>24</sup>, Glykeria Tzatzagou<sup>25</sup>, Maria Chini<sup>26</sup>, Vasileios Kotsis<sup>27</sup>, George Tsoukalas<sup>28</sup>, Ioannis Bliziotis<sup>29</sup>, Michael Doulmas<sup>30</sup>, Aikaterini Argyraki<sup>31</sup>, Ilias Kainis<sup>32</sup>, Massimo Fantoni<sup>33</sup>, Antonella Cingolani<sup>33</sup>, Andrea Angheben<sup>34</sup>, Chiara Simona Cardellino<sup>34</sup>, Francesco Castelli<sup>35</sup>, Francesco Saverio Serino<sup>36</sup>, Emanuele Nicastrì<sup>37</sup>, Giuseppe Ippolito<sup>37</sup>, Matteo Bassetti<sup>38</sup>, Carlo Selmi<sup>39</sup>, Evdoxia Kyriazopoulou<sup>4</sup>, Thomas Huet<sup>40</sup>, Giulio Cavalli<sup>41</sup>, Andrea Gori<sup>3</sup>, Miltiades Kyprianou<sup>4</sup>, Peter Pickkers<sup>42</sup>, Jesper Eugen-Olsen<sup>43</sup>, Mario Clerici<sup>44</sup>, Francisco Veas<sup>45</sup>, Gilles Chatellier<sup>40</sup>, Gilles Kaplanski<sup>46</sup>, Mihai G. Netea<sup>47</sup>, Emanuele Pontali<sup>48</sup>, Marco Gattorno, Raphael Cauchois<sup>46</sup>, Emma Kooistra<sup>42</sup>, Matthijs Kox<sup>42</sup>, Alessandra Bandera<sup>3</sup>, Hélène Beaussier<sup>40</sup>, Davide Mangioni, Lorenzo Dagna<sup>41</sup>, Jos W. M. van der Meer<sup>47</sup>, Evangelos J Giamarellos-Bourboulis<sup>4</sup>, Gilles Hayem<sup>40</sup>

<sup>1</sup>Center for Autoinflammatory diseases and Immunodeficiencies, IRCCS G. Gaslini, Genova Italy

<sup>2</sup>Department of Health Sciences, Section of Biostatistics, University of Genoa; Italy; Ospedale Policlinico San Martino-IRCCS

<sup>3</sup>Infectious Disease Unit, Fondazione IRCCS Ca' Granda Ospedale Maggiore Policlinico, Milan, Italy.

<sup>4</sup><sup>th</sup> Department of Internal Medicine, National and Kapodistrian University of Athens, Athens, Greece

<sup>5</sup><sup>rd</sup> Department of Internal Medicine, National and Kapodistrian University of Athens, Athens, Greece

<sup>6</sup><sup>st</sup> Department of Critical Care and Pulmonary Medicine, Medical School, National and Kapodistrian University of Athens, Evangelismos General Hospital, Athens, Greece

<sup>7</sup><sup>nd</sup> Department of Internal Medicine, Democritus University of Thrace, Medical School, Alexandroupolis, Greece

<sup>8</sup><sup>st</sup> Department of Internal Medicine, Aristotle University of Thessaloniki, Medical School, Thessaloniki, Greece

- <sup>9</sup>Department of Medicine and Research Laboratory of Internal Medicine, National Expertise Center of Greece in Autoimmune Liver Diseases, General University Hospital of Larissa, Larissa, Greece
- <sup>10</sup>1<sup>st</sup> Department of Internal Medicine, University of Ioannina, School of Health Sciences, Faculty of Medicine, Ioannina, Greece
- <sup>11</sup>Department of Pulmonary Medicine, General Hospital of Kerkyra, Corfu, Greece
- <sup>12</sup>Department of Internal Medicine, University of Patras, Medical School, Rion, Greece
- <sup>13</sup>2<sup>nd</sup> Department of Internal Medicine, Tzaneio General Hospital of Piraeus, Athens, Greece
- <sup>14</sup>1<sup>st</sup> Department of Internal Medicine, G. Gennimatas General Hospital of Athens, Athens, Greece
- <sup>15</sup>Department of Internal Medicine, Elpis General Hospital, Athens, Greece
- <sup>16</sup>2<sup>nd</sup> Department of Pulmonary Medicine, Sotiria General Hospital of Chest Diseases, Athens, Greece
- <sup>17</sup>2<sup>nd</sup> Department of Internal Medicine, Thriasio General Hospital of Eleusis, Athens, Greece
- <sup>18</sup>1<sup>st</sup> Department of Internal Medicine, Thriasio General Hospital of Eleusis, Athens, Greece
- <sup>19</sup>2<sup>nd</sup> Department of Internal Medicine, Konstantopouleio General Hospital, Athens, Greece
- <sup>20</sup>Department of Therapeutics, National and Kapodistrian University of Athens, Medical School, Athens, Greece
- <sup>21</sup>1<sup>st</sup> Department of Internal Medicine, National and Kapodistrian University of Athens, Medical School, Athens, Greece
- <sup>22</sup>1<sup>st</sup> Department of Chest Medicine, National and Kapodistrian University of Athens, Medical School, Athens, Greece
- <sup>23</sup>1<sup>st</sup> Department of Internal Medicine, Korgialeneion-Benakeion General Hospital, Athens, Greece
- <sup>24</sup>5<sup>th</sup> Department of Pulmonary Medicine, Sotiria General Hospital of Chest Diseases, Athens, Greece
- <sup>25</sup>1<sup>st</sup> Department of Internal Medicine, Papageorgiou General Hospital of Thessaloniki, Thessaloniki, Greece
- <sup>26</sup>3<sup>rd</sup> Department of Internal Medicine and Infectious Diseases Unit, Korgialeneion-Benakeion General Hospital, Athens, Greece
- <sup>27</sup>3<sup>rd</sup> Department of Internal Medicine, Aristotle University of Thessaloniki, Medical School, Thessaloniki, Greece
- <sup>28</sup>4<sup>th</sup> Department of Pulmonary Medicine, Sotiria General Hospital of Chest Diseases, Athens, Greece
- <sup>29</sup>1<sup>st</sup> Department of Internal Medicine, Asklipieio General Hospital of Voula, Greece
- <sup>30</sup>2<sup>nd</sup> Department of Propedeutic Medicine, Aristotle University of Thessaloniki, Medical School, Thessaloniki, Greece
- <sup>31</sup>Department of Internal Medicine, Sotiria General Hospital of Chest Diseases, Greece
- <sup>32</sup>10<sup>th</sup> Department of Pulmonary Medicine, Sotiria General Hospital of Chest Diseases of Athens, Greece
- <sup>33</sup>Dipartimento Scienze di Laboratorio e Infettivologiche - Fondazione Policlinico Gemelli IRCCS, Roma Italy
- <sup>34</sup>Department of Infectious – Tropical Diseases and Microbiology, IRCSS Sacro Cuore Hospital, Negrar, Verona, Italy
- <sup>35</sup>Spedali Civili, Brescia ASST Spedali Civili Hospital, University of Brescia, Italy
- <sup>36</sup>Department of Internal Medicine, Hospital of Jesolo, Italy
- <sup>37</sup>Department of Internal Medicine, Spallanzani Institute of Rome, Italy

- <sup>38</sup>Infectious Diseases Clinic, Ospedale Policlinico San Martino IRCCS and Department of Health Sciences, University of Genova, Genoa, Italy
- <sup>39</sup>Humanitas Research Hospital, Milan, Italy
- <sup>40</sup>Rheumatology Department, Groupe Hospitalier Paris Saint-Joseph, Paris, France
- <sup>41</sup>Unit of Immunology, Rheumatology, Allergy, and Rare Diseases, IRCCS San Raffaele Scientific Institute; Vita-Salute San Raffaele University, Milan, Italy
- <sup>42</sup>Department of Intensive Care Medicine, Radboud University, Nijmegen, The Netherlands
- <sup>43</sup>Department of Clinical Research, Copenhagen University Hospital, Hvidovre, Denmark
- <sup>44</sup>Don C. Gnocchi Foundation, IRCCS, Milan, Italy
- <sup>45</sup>Montpellier University, IRD, Mitigation Strategies for Biosecurity Risks Lab/MSBR, Faculty of Pharmacy, Montpellier, France
- <sup>46</sup>Assistance Publique - Hôpitaux de Marseille, Division of Internal Medicine and Clinical Immunology, Hôpital Conception, Aix-Marseille Université, Marseille, France
- <sup>47</sup>Department of Internal Medicine and Center for Infectious Diseases, Radboud University, Nijmegen, The Netherlands
- <sup>48</sup>Ente Ospedaliero Galliera, Genova, Italy
- <sup>49</sup>Center for Autoinflammatory diseases and Immunodeficiencies, IRCCS G. Gaslini, Genova, Italy
